# Supplementary material
Source: PubMed Central journal article supplement (PMC2888921)
Supplement: NIHMS203769-supplement-2.pdf [file NIHMS203769-supplement-2.pdf]

# Supplemental Table 1

---

**Bisulfite modified sequencing**

---

|       |            |                                           |
|-------|------------|-------------------------------------------|
| COX-1 | Forward    | 5'-GTTTTGGGTGATTTTAGTATTGAG-3'            |
|       | Reverse    | 5'-TAAACCTAACATTCAAACTCCAC-3'             |
|       | Sequencing | 5'-GTTTTTTGTTTATATTTAGTGTTATTAGGTATTAG-3' |

---

**Methylation specific PCR**

---

|       |           |                             |
|-------|-----------|-----------------------------|
| COX-1 | M-MSP (F) | 5'-GAAGTAAGCGGGTAGTCG-3'    |
|       | M-MSP (R) | 5'-GTACGCCTCGCACACTAC-3'    |
|       | U-MSP (F) | 5'-AGGAAGTAAGTGGGTAGTTGA-3' |
|       | U-MSP (R) | 5'-TACATACACCTCACACTAC-3'   |

---

**Real time RT-PCR**

---

|                   |                                                    |                                  |
|-------------------|----------------------------------------------------|----------------------------------|
| COX-1             | Forward                                            | 5'-AGCAGCTTTTCCAGACGACC-3'       |
|                   | Reverse                                            | 5'-CGGTTGCGGTATTGGAAGT-3'        |
|                   | Probe                                              | 5'-CGTGCAGCAGCTGAGTGGCTATTTC-3'. |
| COX-2             | Forward                                            | 5'-CCAGCACTTACGCATCAGT-3'        |
|                   | Reverse                                            | 5'-ACGCTGTCTAGCCAGAGTTTCAC-3'    |
|                   | Probe                                              | 5'-GGCTGGGCCATGGGGTGGACTTAAAT-3' |
| GAPDH             | Forward                                            | 5'-CCATGGAGAAGGCTGGGG-3'         |
|                   | Reverse                                            | 5'-CAAAGTTGTCATGGATGACC-3'       |
| PGK1              | Forward                                            | 5'-CTTCCAGGAGCTCCAACTG-3'        |
|                   | Reverse                                            | 5'-GCTTCATGGATGAGGTGGT-3'        |
| 18s ribosomal RNA | Cat#4319413E (Applied Biosystems, Foster city, CA) |                                  |
