# Supplementary material
Source: PubMed Central journal article supplement (PMC2888921)

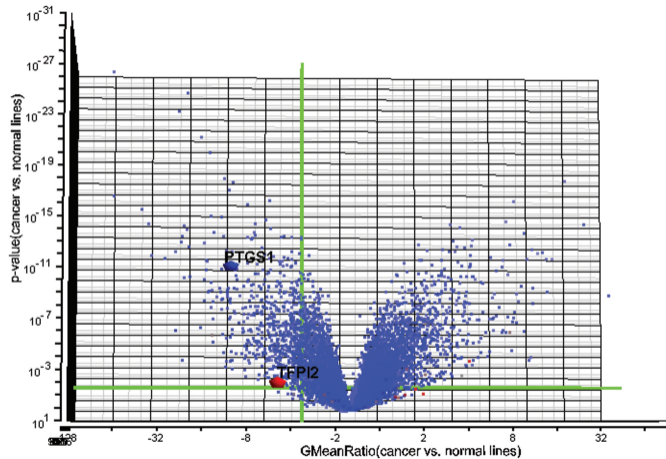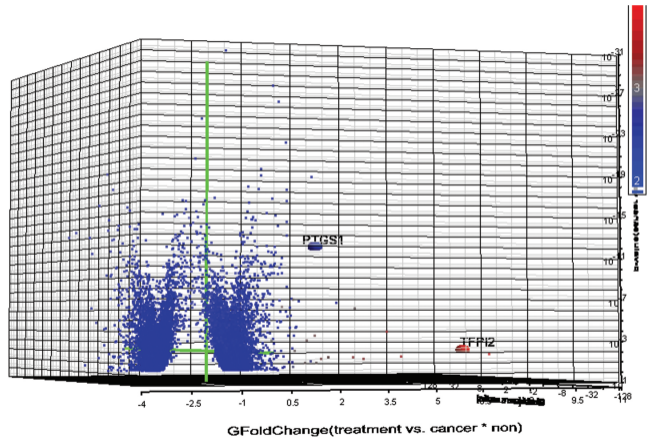

Supplement: NIHMS203769-supplement-3.pdf [file NIHMS203769-supplement-3.pdf]

# Supplemental Figure 2

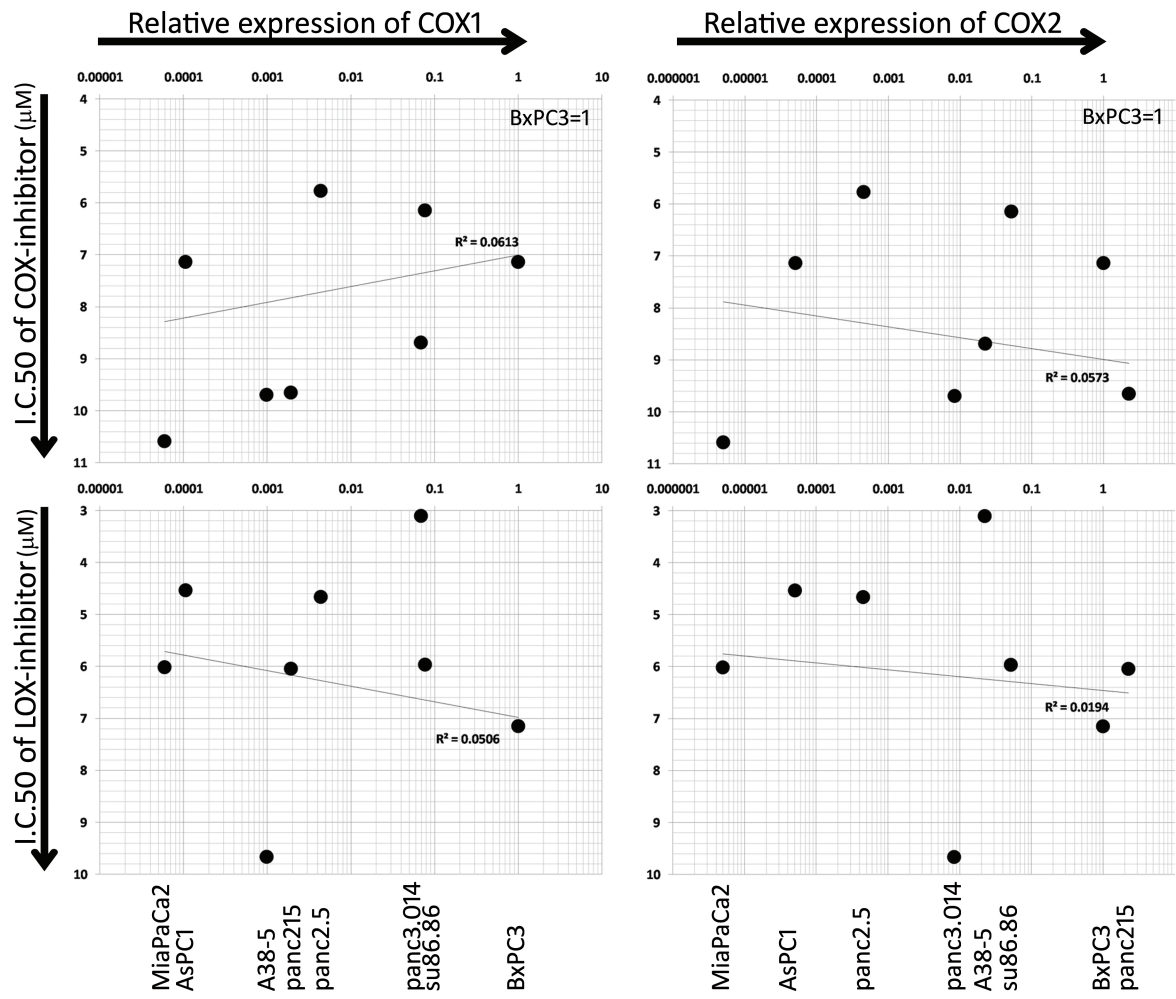

Supplement: NIHMS203769-supplement-4.pdf [file NIHMS203769-supplement-4.pdf]
